# Supplementary material for: Cytoplasmic Nucleophosmin in Acute Myelogenous Leukemia with a Normal Karyotype
Source: Atypon-hosted journal article supplement (doi:10.1056/nejmoa041974), 2005-01-19
Supplement: 254sa1.pdf [file 254sa1.pdf]

# Supplementary Appendix 1

This appendix has been provided by the authors to give readers additional information about their work.

Supplement to: Falini B, Mecucci C, Tiacci E, et al. Cytoplasmic nucleophosmin in acute myelogenous leukemia with a normal karyotype. *N Engl J Med* 2005;352:254-66.

## Appendix 1A

### **(GIMEMA LAM99P and EORTC AML12 Protocols)**

Between 1999 and 2002, the GIMEMA Cooperative Group treatment for adult AML (age:15-60) was based on the GIMEMA LAM 99P protocol which included:

- A 5-day pre-treatment with hydroxyurea (HU) at 2 g/sqm/day from days –4 to 0;
- Induction treatment with a 3-drug regimen: Daunorubicine (DNR) 50 mg/sqm/day on days 1, 3 and 5; Cytosine-Arabinoside (ARA-C) 100 mg/sqm/day on days 1 to 10; Etoposide 100 mg/sqm/day on days 1 to 5; to be repeated in case of partial remission (PR);
- Consolidation therapy with DNR (50 mg/sqm/day on days 4 to 6) and intermediate-doses ARA-C (500 mg/sqm/12 h on days 1 to 6) for patients achieving CR after either the first or the second induction cycle.

Post-consolidation treatment consisted of allogeneic stem cell transplantation (SCT) for patients with HLA-identical siblings, and peripheral blood stem cell autograft for patients without donors.

Since 2001, the GIMEMA Centers have started using the new EORTC AML12 protocol, which includes a double randomization. The first randomization is between two induction schedules, including either standard or high-dose ARA-C. After achieving CR, patients who are not eligible for allogeneic SCT undergo autologous SCT and then are randomized between either rIL-2 maintenance or no treatment. As the EORTC-GIMEMA AML12 study is still ongoing, no data about clinical outcome have been disclosed by the GIMEMA Data Center. Therefore, only clinical and biological characteristics at diagnosis are available for the patients who were studied for subcellular expression of NPM.

## Appendix 1B: FLT3 mutations and NPM

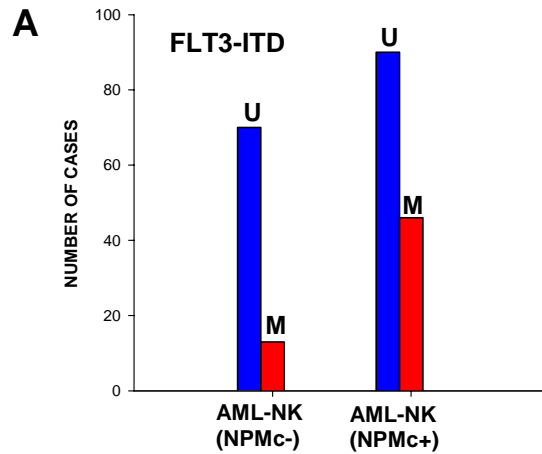

**Legend:** FLT3-ITD mutations according to subcellular NPM expression (NPMc+ vs NPMc-) in AMLs with normal Karyotype (NK). U= Unmutated; M= Mutated.

### B

| Indep. Var.  | Parameter est. | Stand. error | Wald   | DF | Sig.  | Odds Ratio (OR) | OR 95,0% CI  |
|--------------|----------------|--------------|--------|----|-------|-----------------|--------------|
| Age          | 0.030          | 0.12         | 6.560  |    | 0.010 | 1.030           | 1.007-1.054  |
| Karyotype *  | 1.781          | 0.306        | 33.840 | 1  | 0.000 | 5.936           | 3.257-10.816 |
| D835(M vs U) | 0.417          | 0.485        | 0.739  | 1  | 0.390 | 1.518           | 0.586-3.929  |
| ITD(M vs U)  | 1.201          | 0.332        | 13.057 | 1  | 0.000 | 3.322           | 1.732-6.371  |
| Constant     | - 2.953        | 0.580        | 25.949 | 1  | 0.000 | 0.052           |              |

Ind. Var.: Independent variables; est.: estimate; Stand.: Standard; DF: Degree of freedom; Sig: Significance; \*: Normal vs abnormal karyotype (excluding major genetic events); M: Mutated; U: Unmutated

**Legend:** To investigate the relationship between NPM localization and FLT3-ITD/D835 mutations, adjusted for age and cytogenetics, a logistic regression model was applied with these factors as independent variables and NPM as dependent variable. AML with major translocations were excluded because their absolute association with nucleus-restricted NPM expression did not provide a valid parameter estimate. The multivariate

logistic regression model establishes the independent association between cytoplasmic NPM (dependent variable) and FLT3-ITD.

# Appendix 1C: NPM mutational analysis in 52 NPMc+

| Code<br>GIMEMA Trial | FAB | CD34       | Karyotype     | FLT3 ITD | FLT3 D835 | Type of mutation               | cDNA                                                | gDNA            | Predicted Protein   | Remission<br>cDNA/gDNA |
|----------------------|-----|------------|---------------|----------|-----------|--------------------------------|-----------------------------------------------------|-----------------|---------------------|------------------------|
| 1 181A/16            | M2  | Neg        | NK            | U        | U         | Dup TCTG (+960)<br>Mutation A  | Pt: gatctctgTCTGcagTgaggaagTcctctttaagaaaatag       | -               | Pt: -DLCIAVEEVSLEK. |                        |
| 2 264A/30            | M1  | Neg        | NK            | U        | U         | Dup TCTG (+960)<br>Mutation A  | Pt: gatctctgTCTGcagTgaggaagTcctctttaagaaaatag       | Dup TCTG (+960) | Pt: -DLCIAVEEVSLEK. | WT/WT                  |
| 3 223A/28            | M5b | Neg        | NK            | M        | U         | Dup TCTG (+960)<br>Mutation A  | Pt: gatctctgTCTGcagTgaggaagTcctctttaagaaaatag       | -               | Pt: -DLCIAVEEVSLEK. | WT/nd                  |
| 4 367A/31            | M1  | Neg        | NK            | M        | U         | Dup TCTG (+960)<br>Mutation A  | Pt: gatctctgTCTGcagTgaggaagTcctctttaagaaaatag       | Dup TCTG (+960) | Pt: -DLCIAVEEVSLEK. | WT/nd                  |
| 5 497A/30            | M5a | Neg        | NK            | M        | U         | Dup TCTG (+960)<br>Mutation A  | Pt: gatctctgTCTGcagTgaggaagTcctctttaagaaaatag       | Dup TCTG (+960) | Pt: -DLCIAVEEVSLEK. | WT/nd                  |
| 6 551A/22            | M1  | <b>Pos</b> | NK            | U        | n.a.      | Dup TCTG (+960)<br>Mutation A  | Pt: gatctctgTCTGcagTgaggaagTcctctttaagaaaatag       | -               | Pt: -DLCIAVEEVSLEK. |                        |
| 7 654A/22            | M4  | Neg        | NK            | U        | U         | Dup TCTG (+960)<br>Mutation A  | Pt: gatctctgTCTGcagTgaggaagTcctctttaagaaaatag       | -               | Pt: -DLCIAVEEVSLEK. |                        |
| 8 66245              | M2  | Neg        | NK            | U        | M         | Dup TCTG (+960)<br>Mutation A  | Pt: gatctctgTCTGcagTgaggaagTcctctttaagaaaatag       | -               | Pt: -DLCIAVEEVSLEK. | WT/nd                  |
| 9 145A/26            | M2  | Neg        | NK            | U        | U         | Dup TCTG (+960)<br>Mutation A  | Pt: gatctctgTCTGcagTgaggaagTcctctttaagaaaatag       | -               | Pt: -DLCIAVEEVSLEK. |                        |
| 10 66219             | M1  | Neg        | NK            | M        | U         | Dup TCTG (+960)<br>Mutation A  | Pt: gatctctgTCTGcagTgaggaagTcctctttaagaaaatag       | -               | Pt: -DLCIAVEEVSLEK. |                        |
| 11 19297             | M1  | Neg        | NK            | M        | U         | No mutations                   |                                                     | -               |                     |                        |
| 12 16402             | M2  | Neg        | NK            | M        | U         | Dup TCTG (+960)<br>Mutation A  | Pt: gatctctgTCTGcagTgaggaagTcctctttaagaaaatag       | -               | Pt: -DLCIAVEEVSLEK. |                        |
| 13 406A/04           | M2  | <b>Pos</b> | NK            | M        | U         | Dup TCTG (+960)<br>Mutation A  | Pt: gatctctgTCTGcagTgaggaagTcctctttaagaaaatag       | -               | Pt: -DLCIAVEEVSLEK. |                        |
| 14 511A/08           | M5a | Neg        | NK            | M        | U         | Dup TCTG (+960)<br>Mutation A  | Pt: gatctctgTCTGcagTgaggaagTcctctttaagaaaatag       | -               | Pt: -DLCIAVEEVSLEK. |                        |
| 15 515A/19           | M1  | Neg        | NK            | U        | U         | Dup TCTG (+960)<br>Mutation A  | Pt: gatctctgTCTGcagTgaggaagTcctctttaagaaaatag       | -               | Pt: -DLCIAVEEVSLEK. |                        |
| 16 537A/02           | M4  | Neg        | NK            | U        | U         | Dup TCTG (+960)<br>Mutation A  | Pt: gatctctgTCTGcagTgaggaagTcctctttaagaaaatag       | -               | Pt: -DLCIAVEEVSLEK. |                        |
| 17 31683             | M5b | Neg        | <b>del9</b>   | U        | U         | Dup TCTG (+960)<br>Mutation A  | Pt: gatctctgTCTGcagTgaggaagTcctctttaagaaaatag       | -               | Pt: -DLCIAVEEVSLEK. |                        |
| 18 22887             | M2  | Neg        | NK            | U        | U         | Ins CDTG (+960)<br>Mutation C  | Pt: gatctctgCSTGcagTgaggaagTcctctttaagaaaatag       | -               | Pt: -DLCIAVEEVSLEK. |                        |
| 19 19948             | M2  | Neg        | failure       | M        | U         | GGAGG->CTCTTGCCC<br>Mutation E | Pt: gatctctgGcagTCTCTGcagTgaggaagTcctctttaagaaaatag | -               | Pt: -DLCIAVEEVSLEK. |                        |
| 20 19872             | M1  | Neg        | n.a.          | n.a.     | U         | Dup TCTG (+960)<br>Mutation A  | Pt: gatctctgTCTGcagTgaggaagTcctctttaagaaaatag       | -               | Pt: -DLCIAVEEVSLEK. |                        |
| 21 111A/85           | M4  | Neg        | NK            | M        | U         | Dup TCTG (+960)<br>Mutation A  | Pt: gatctctgTCTGcagTgaggaagTcctctttaagaaaatag       | -               | Pt: -DLCIAVEEVSLEK. |                        |
| 22 750A/28           | M5a | Neg        | NK            | U        | U         | Ins CATG (+960)<br>Mutation B  | Pt: gatctctgCATGcagTgaggaagTcctctttaagaaaatag       | -               | Pt: -DLCIAVEEVSLEK. |                        |
| 23 88059             | M4  | Neg        | NK            | U        | U         | Dup TCTG (+960)<br>Mutation A  | Pt: gatctctgTCTGcagTgaggaagTcctctttaagaaaatag       | -               | Pt: -DLCIAVEEVSLEK. |                        |
| 24 814A/26           | M5a | Neg        | NK            | M        | U         | Dup TCTG (+960)<br>Mutation A  | Pt: gatctctgTCTGcagTgaggaagTcctctttaagaaaatag       | -               | Pt: -DLCIAVEEVSLEK. |                        |
| 25 210A/28           | M4  | <b>Pos</b> | <b>Tris 8</b> | U        | U         | Dup TCTG (+960)<br>Mutation A  | Pt: gatctctgTCTGcagTgaggaagTcctctttaagaaaatag       | -               | Pt: -DLCIAVEEVSLEK. |                        |
| 26 114A/04           | M4  | Neg        | NK            | U        | M         | Dup TCTG (+960)<br>Mutation A  | Pt: gatctctgTCTGcagTgaggaagTcctctttaagaaaatag       | -               | Pt: -DLCIAVEEVSLEK. |                        |
| 27 66298             | M5b | Neg        | NK            | U        | U         | Ins CCTG (+960)<br>Mutation D  | Pt: gatctctgCCTGcagTgaggaagTcctctttaagaaaatag       | Ins CCTG (+960) | Pt: -DLCIAVEEVSLEK. |                        |
| 28 536A/28           | M5a | Neg        | NK            | U        | U         | Dup TCTG (+960)<br>Mutation A  | Pt: gatctctgTCTGcagTgaggaagTcctctttaagaaaatag       | Dup TCTG (+960) | Pt: -DLCIAVEEVSLEK. |                        |
| 29 19108             | M5b | Neg        | <b>Tris 8</b> | M        | M         | Dup TCTG (+960)<br>Mutation A  | Pt: gatctctgTCTGcagTgaggaagTcctctttaagaaaatag       | Dup TCTG (+960) | Pt: -DLCIAVEEVSLEK. |                        |
| 30 27696             | M4  | Neg        | NK            | U        | U         | Dup TCTG (+960)<br>Mutation A  | Pt: gatctctgTCTGcagTgaggaagTcctctttaagaaaatag       | -               | Pt: -DLCIAVEEVSLEK. |                        |
| 31 28698             | M2  | Neg        | Failure       | M        | U         | Dup TCTG (+960)<br>Mutation A  | Pt: gatctctgTCTGcagTgaggaagTcctctttaagaaaatag       | -               | Pt: -DLCIAVEEVSLEK. |                        |
| 32 27900             | M4  | Neg        | NK            | U        | U         | Dup TCTG (+960)<br>Mutation A  | Pt: gatctctgTCTGcagTgaggaagTcctctttaagaaaatag       | -               | Pt: -DLCIAVEEVSLEK. |                        |
| 33 27926             | M5b | Neg        | NK            | M        | U         | Ins CATG (+960)<br>Mutation B  | Pt: gatctctgCATGcagTgaggaagTcctctttaagaaaatag       | -               | Pt: -DLCIAVEEVSLEK. |                        |
| 34 28650             | M1  | Neg        | NK            | U        | U         | Ins CATG (+960)<br>Mutation B  | Pt: gatctctgCATGcagTgaggaagTcctctttaagaaaatag       | -               | Pt: -DLCIAVEEVSLEK. |                        |



# Appendix 1D

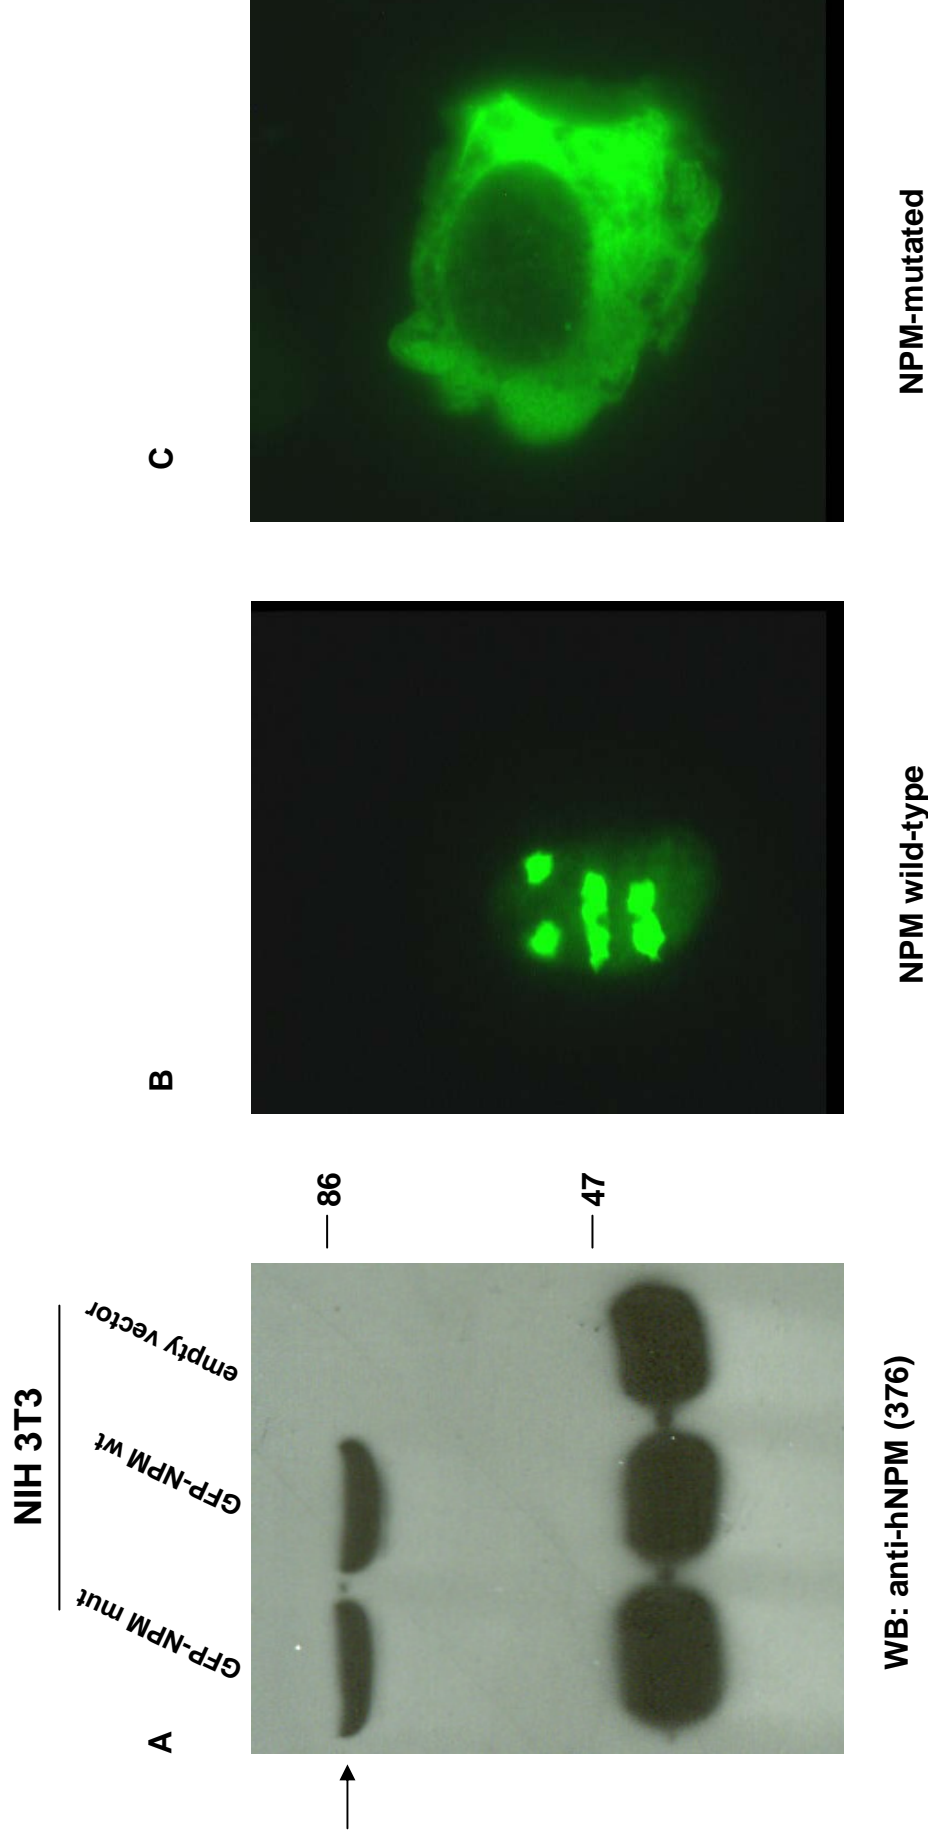

**Figure Legends:** NIH 3T3 cells were transfected with pEGFP-C1 empty vector and with the GFP fusion construct of normal and mutated human NPM protein. **A:** Cell lysates were used for Western blotting assay. Immunodetection was performed with anti-human NPM mAb (clone 376). Both GFP-NPMwt and GFP-NPMmut proteins were detected (arrow). The lower bands (40KDa) represent endogenous murine NPM protein (an epitope of which is recognized by the 376 clone). **B:** The NPMwt localizes in the nucleoli. **C:** The mutated NPM localizes aberrantly in the cytoplasm.
